# Supplementary material
Source: PubMed Central journal article supplement (PMC8373621)
Supplement: NIHMS1676641-supplement-Supplemental_Digital_Content_2.pdf [file NIHMS1676641-supplement-Supplemental_Digital_Content_2.pdf]

## SUPPLEMENTAL DIGITAL CONTENT 2

### Diagnostic Errors in Pediatric Critical Care: A Systematic Review

Christina L. Cifra, MD, MS, Jason W. Custer, MD, Hardeep Singh, MD, MPH, James C. Fackler, MD

### Supplement to Results

**Supplement Table. Characteristics of Included Studies and Types of Information Provided on Diagnostic Errors in the Pediatric Intensive Care Unit**

| Authors                               | Year | Title                                                                                                                         | Research Design                                                                               | Objective                                                                                                                                                        | Relevant Sample                                                                                                            | Relevant Information on Diagnostic Errors                                                                                             |
|---------------------------------------|------|-------------------------------------------------------------------------------------------------------------------------------|-----------------------------------------------------------------------------------------------|------------------------------------------------------------------------------------------------------------------------------------------------------------------|----------------------------------------------------------------------------------------------------------------------------|---------------------------------------------------------------------------------------------------------------------------------------|
| Avesar M, et al. (abstract only) (23) | 2019 | The effect of rudeness on challenging diagnostic error: A randomized controlled simulation trial                              | Randomized controlled trial                                                                   | Determine the effect of rude behavior on challenging a diagnosis in the PICU.                                                                                    | 35 simulation events involving 35 teams with an overall composition of 13 residents, 12 fellows, 10 attendings in the PICU | Factors contributing to diagnostic errors                                                                                             |
| Bhat PN, et al. (20)                  | 2018 | Diagnostic errors in paediatric cardiac intensive care                                                                        | Cross-sectional survey                                                                        | To understand the frequency and types of diagnostic error in the pediatric cardiac ICU.                                                                          | 200 pediatric cardiac ICU clinicians                                                                                       | Prevalence of diagnostic errors (from clinician survey); Conditions misdiagnosed; Factors associated with diagnostic error            |
| Blanco C, et al. (11)                 | 2014 | Discrepancies between autopsy and clinical findings among patients requiring extracorporeal membrane oxygenator support       | Retrospective cohort                                                                          | Assess discrepancies between premortem and postmortem diagnosis among PICU patients who required ECMO support.                                                   | 54 patients admitted to a single PICU who required ECMO                                                                    | Prevalence of diagnostic errors (from autopsy)                                                                                        |
| Carlotti AP, et al. (10)              | 2016 | Discrepancies Between Clinical Diagnoses and Autopsy Findings in Critically Ill Children: A Prospective Study                 | Retrospective cohort                                                                          | Evaluate discrepancies between clinical and autopsy diagnoses in patients who died in 2 PICUs at a single center.                                                | 123 patients with autopsies admitted to a single PICU                                                                      | Prevalence of diagnostic errors (from autopsy)                                                                                        |
| Cifra CL, et al. (14)                 | 2014 | The morbidity and mortality conference as an adverse event surveillance tool in a paediatric intensive care unit              | Retrospective cohort - review of conference minutes, chart review, review of incident reports | Compare safety event information gleaned from chart review vs. the morbidity and mortality conference.                                                           | 96 patients discussed at a single PICU's morbidity and mortality conference                                                | Prevalence of errors (from the morbidity and mortality conference)                                                                    |
| Cifra CL, et al. (12)                 | 2018 | Piloting methods to determine factors associated with diagnostic error on admission to a pediatric intensive care unit (PICU) | Retrospective cohort - chart review using the Safer Dx Instrument                             | Determine feasibility of chart review to identify patient, provider, and work system factors associated with diagnostic error in 1st 24 hours of PICU admission. | 50 patients non-electively admitted to a single PICU                                                                       | Prevalence of diagnostic errors (from chart review); Conditions misdiagnosed; Factors associated with diagnostic error                |
| Cifra CL, et al. (15)                 | 2015 | Diagnostic Errors in a PICU: Insights from the Morbidity and Mortality Conference                                             | Retrospective cohort - review of conference minutes, chart review                             | Describe diagnostic errors and their characteristics as discussed at a PICU morbidity and mortality conference.                                                  | 96 patients discussed at a single PICU's morbidity and mortality conference                                                | Prevalence of errors (from the morbidity and mortality conference); Conditions misdiagnosed; Factors associated with diagnostic error |

|                                       |      |                                                                                                                                                       |                                                                   |                                                                                                                                                            |                                                                                       |                                                                                                                                       |
|---------------------------------------|------|-------------------------------------------------------------------------------------------------------------------------------------------------------|-------------------------------------------------------------------|------------------------------------------------------------------------------------------------------------------------------------------------------------|---------------------------------------------------------------------------------------|---------------------------------------------------------------------------------------------------------------------------------------|
| Cifra CL, et al. (abstract only) (24) | 2017 | Using ethnography to understand the diagnostic process in a pediatric intensive care unit                                                             | Focused ethnography                                               | Pilot test the feasibility of ethnography to examine the diagnostic process during patient admission to the PICU.                                          | 6 PICU clinicians                                                                     | Factors contributing to the diagnostic process                                                                                        |
| Custer JW, et al. (8)                 | 2015 | Diagnostic errors in the pediatric and neonatal ICU: A systematic review                                                                              | Systematic review of 7 PICU autopsy studies                       | Assess diagnostic errors in the PICU by systematic review.                                                                                                 | 498 PICU patients with autopsies included in 7 studies                                | Prevalence of diagnostic errors (from autopsies)                                                                                      |
| Davalos MC, et al. (13)               | 2017 | Finding Diagnostic Errors in Children Admitted to the PICU                                                                                            | Retrospective cohort - chart review using the Safer Dx Instrument | Determine whether the Safer Dx Instrument can be used to reliably detect diagnostic errors in a PICU cohort.                                               | 214 patients admitted to a single PICU                                                | Prevalence of diagnostic errors (from chart review)                                                                                   |
| Fink AZ, et al. (17)                  | 2018 | Discrepancies in Radiograph Interpretation Between Pediatric Radiologists and Pediatric Intensivists in the Pediatric or Neonatal Intensive Care Unit | Retrospective cohort                                              | Quantify and classify discrepancies in radiographic interpretation between pediatric radiologists and pediatric intensivists at PICUs and NICUs.           | 575 radiographs of patients admitted to a single PICU                                 | Prevalence of diagnostic errors (in radiographic interpretation)                                                                      |
| Fischer JE, et al. (22)               | 2003 | Hindsight judgement on ambiguous episodes of suspected infection in critically ill children: poor consensus amongst experts?                          | Retrospective cohort - chart review                               | Determine agreement between ICU and infectious disease experts regarding classification of cases along the sepsis/infection spectrum.                      | 167 patients with suspected infection admitted to a single PICU                       | Factors contributing to diagnostic errors                                                                                             |
| Frey B, et al. (16)                   | 2018 | The morbidity and mortality conference as a tool to reveal diagnostic errors                                                                          | Retrospective cohort - review of conference minutes               | Present the experience of a single PICU in an interdisciplinary morbidity and mortality conference emphasizing its usefulness in improving patient safety. | 48 patients discussed at a single PICU's morbidity and mortality conference           | Prevalence of errors (from the morbidity and mortality conference); Conditions misdiagnosed; Factors associated with diagnostic error |
| Labib JR, et al. (19)                 | 2019 | Incident reporting system in pediatric intensive care units of a Cairo tertiary hospital: An intervention study                                       | Quasi-experimental pre-test/post-test design                      | Enhance patient safety in 4 PICUs by enhancing health care professionals' error reporting attitudes and practices.                                         | 215 incident reports submitted regarding the care of 918 patients admitted to 4 PICUs | Prevalence of errors (from incident reports)                                                                                          |
| Nesterova GV, et al. (18)             | 2010 | Discordance in interpretation of chest radiographs between pediatric intensivists and a radiologist: impact on patient management                     | Retrospective cohort                                              | Investigate the frequency of errors in chest radiograph interpretation by pediatric intensivists and their impact on patient management.                   | 460 radiographs of patients admitted to a single PICU                                 | Prevalence of diagnostic errors (in radiographic interpretation)                                                                      |
| Su L, et al. (abstract only) (21)     | 2015 | Video review produces insight into diagnostic errors                                                                                                  | Qualitative review of clinical videos                             | Describe clinician behaviors at the bedside that may provide insight into how diagnostic errors occur.                                                     | Pediatric cardiac ICU clinicians, number not reported                                 | Factors contributing to diagnostic errors                                                                                             |
| Widmann R, et al. (9)                 | 2017 | Value of postmortem studies in deceased neonatal and pediatric intensive care unit patients                                                           | Retrospective cohort                                              | Determine prevalence and distribution of autopsy-confirmed diagnostic errors.                                                                              | 39 patients with autopsies admitted to a single PICU                                  | Prevalence of diagnostic errors (from autopsies)                                                                                      |

PICU - pediatric intensive care unit, ECMO - extra-corporeal membrane oxygenation
